# Supplementary material for: Phase and Structural Thermal Evolution of Bi–Si–O Catalysts Obtained via Laser Ablation
Source: MDPI journal article supplement (doi:10.3390/nano12224101), 2022-11-21
Supplement: s1 [file s1]

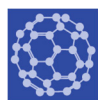

Supplementary

# Phase and Structural Thermal Evolution of Bi–Si–O Catalysts Obtained via Laser Ablation

Anastasiia V. Shabalina <sup>1,\*</sup>, Alexandra G. Golubovskaya <sup>1</sup>, Elena D. Fakhrutdinova <sup>1</sup>, Sergei A. Kulinich <sup>2,\*</sup>, Olga V. Vodyankina <sup>3</sup> and Valery A. Svetlichnyi <sup>1</sup>

<sup>1</sup> Laboratory of Advanced Materials and Technology, Tomsk State University, Tomsk 634050, Russia

<sup>2</sup> Research Institute of Science & Technology, Tokai University, Hiratsuka 259-1292, Japan

<sup>3</sup> Laboratory of Catalytic Research, Tomsk State University, Tomsk 634050, Russia

\* Correspondence: shabalinaav-1985@yandex.ru (A.V.S.); skulinich@tokai-u.jp (S.A.K.)

## Supplementary Materials

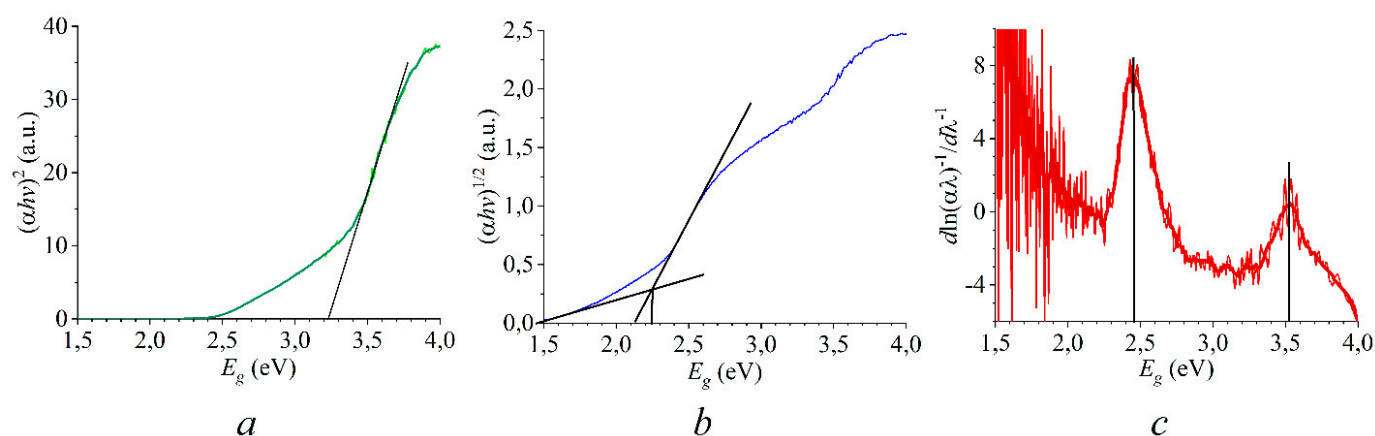

**Figure S1.** An example of band gap estimation for sample BSO\_4: (a) Tauc method, short-wavelength band, direct-gap transition of  $\text{Bi}_2\text{SiO}_5$ ; (b) long-wavelength band, non-direct-gap transition of  $\beta\text{-Bi}_2\text{O}_3$ ; (c) DAS method.

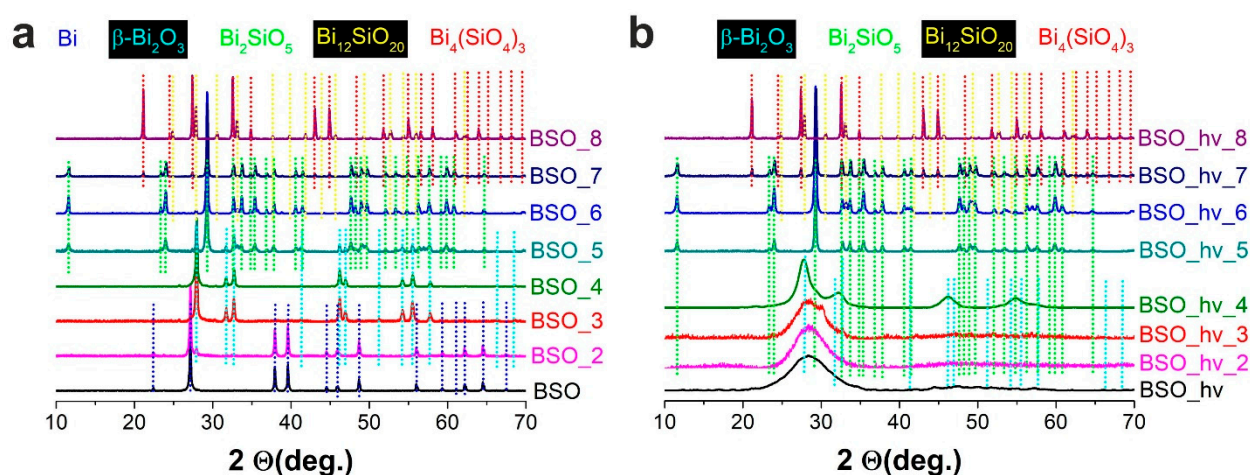

**Figure S2.** XRD patterns of non-irradiated samples BSO (a) and laser-irradiated samples BSO\_hv (b) before and after thermal treatment, with detected phases marked.

**Table S1.** Phase composition of samples obtained from XRD data.

| Sample   | Phase content (%) |                                         |                                  |                                    |
|----------|-------------------|-----------------------------------------|----------------------------------|------------------------------------|
|          | Bi                | $\beta$ -Bi <sub>2</sub> O <sub>3</sub> | Bi <sub>2</sub> SiO <sub>5</sub> | Bi <sub>12</sub> SiO <sub>20</sub> |
| BSO      | 100               | —                                       | —                                | —                                  |
| BSO_2    | 70                | 30                                      | —                                | —                                  |
| BSO_3    | 3                 | 97                                      | —                                | —                                  |
| BSO_4    | —                 | 100                                     | —                                | —                                  |
| BSO_5    | —                 | 15                                      | 85                               | —                                  |
| BSO_6    | —                 | —                                       | 97                               | 3                                  |
| BSO_7    | —                 | —                                       | 90                               | 4                                  |
| BSO_8    | —                 | —                                       | —                                | 30                                 |
| BSO_hv   |                   | amorphous                               |                                  |                                    |
| BSO_hv_2 |                   | amorphous                               |                                  |                                    |
| BSO_hv_3 |                   | amorphous                               |                                  |                                    |
| BSO_hv_4 |                   | amorphous                               |                                  |                                    |
| BSO_hv_5 | —                 | —                                       | 100                              | —                                  |
| BSO_hv_6 | —                 | —                                       | 98                               | 2                                  |
| BSO_hv_7 | —                 | —                                       | 93                               | 2                                  |
| BSO_hv_8 | —                 | —                                       | —                                | 30                                 |

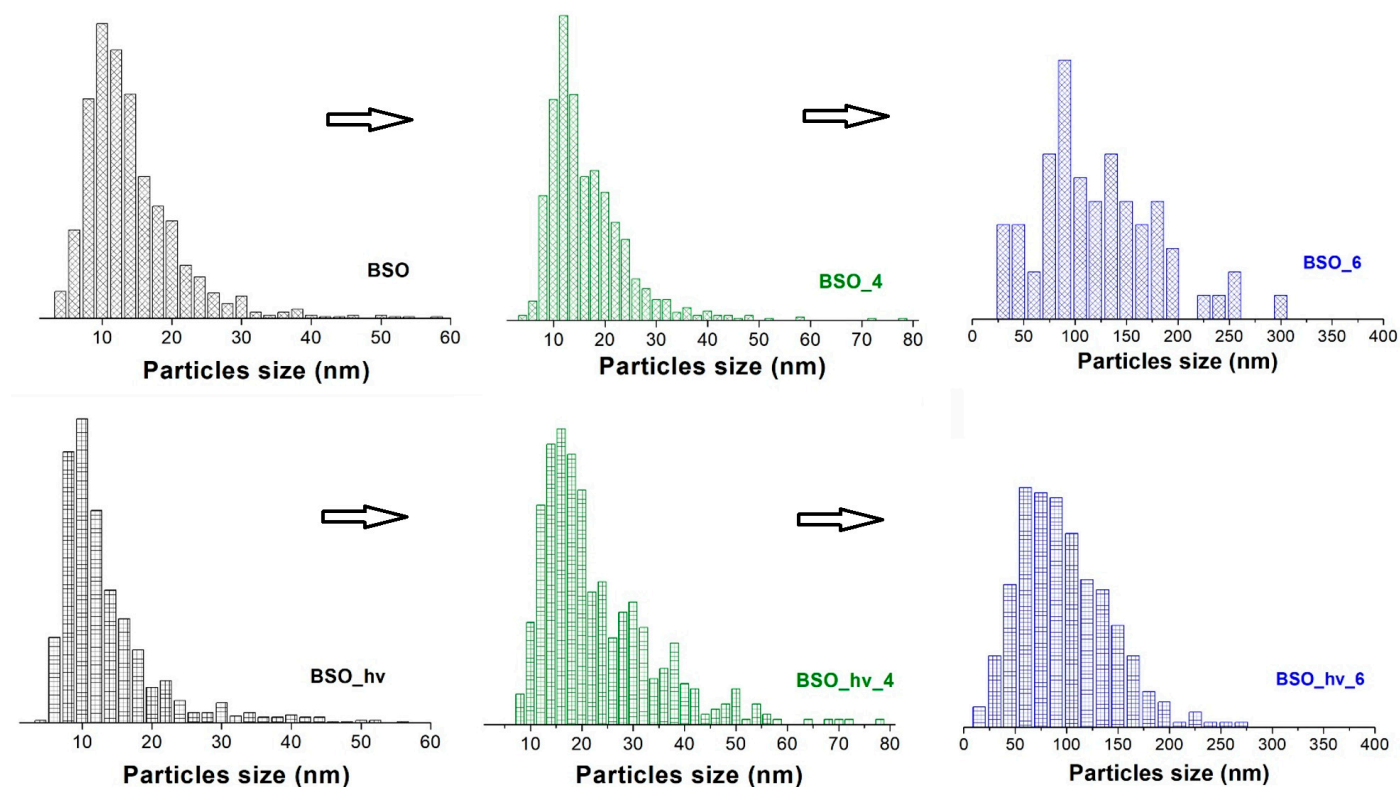**Figure S3.** Evolution of particle size distribution for samples BSO (top row) and BSO<sub>h</sub>v (bottom row) at selected temperatures (initial → 400 °C → 600 °C).

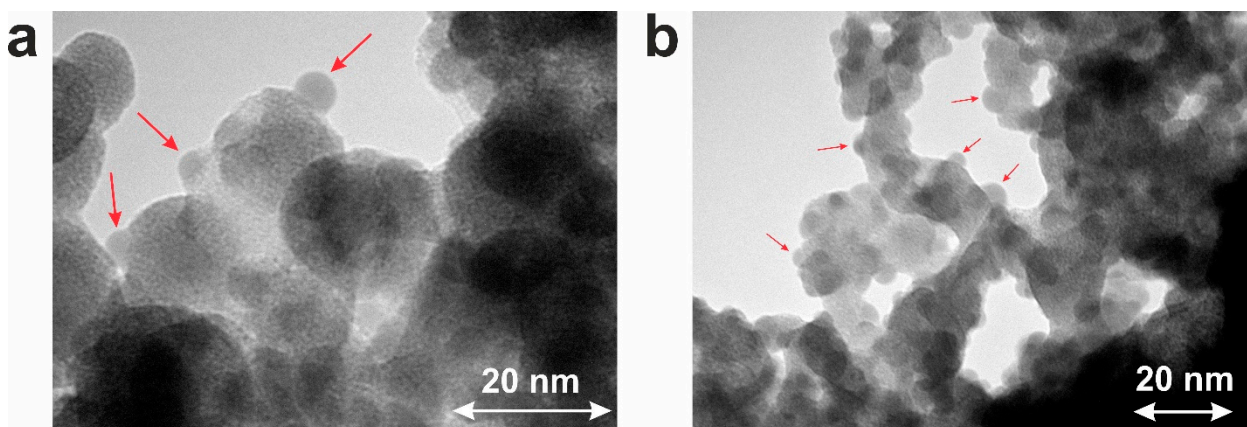

**Figure S4.** TEM images of initial samples BSO (a) and BSO<sub>hv</sub> (b). Spherical silica-based particles are marked with red arrows.

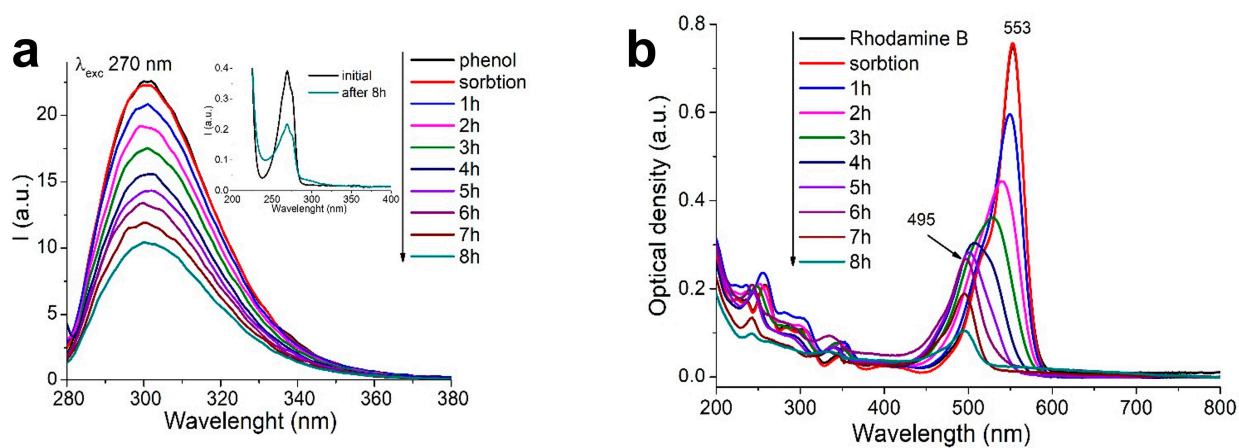

**Figure S5.** Changes in fluorescence spectra upon photodecomposition of phenol (a), and absorption spectra upon photodecomposition of Rd B (b). Inset in panel (a) shows absorption spectra of phenol.

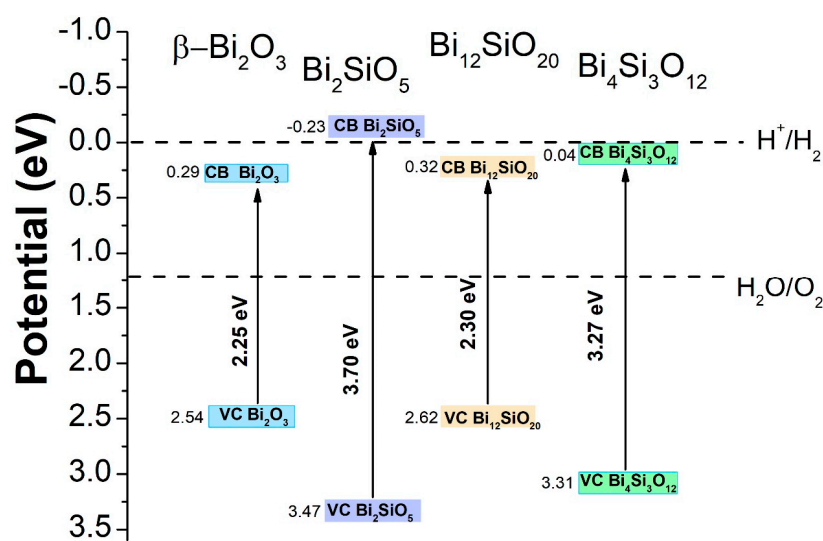

Figure S6. Energy diagram for  $\beta\text{-Bi}_2\text{O}_3$  and bismuth silicates.

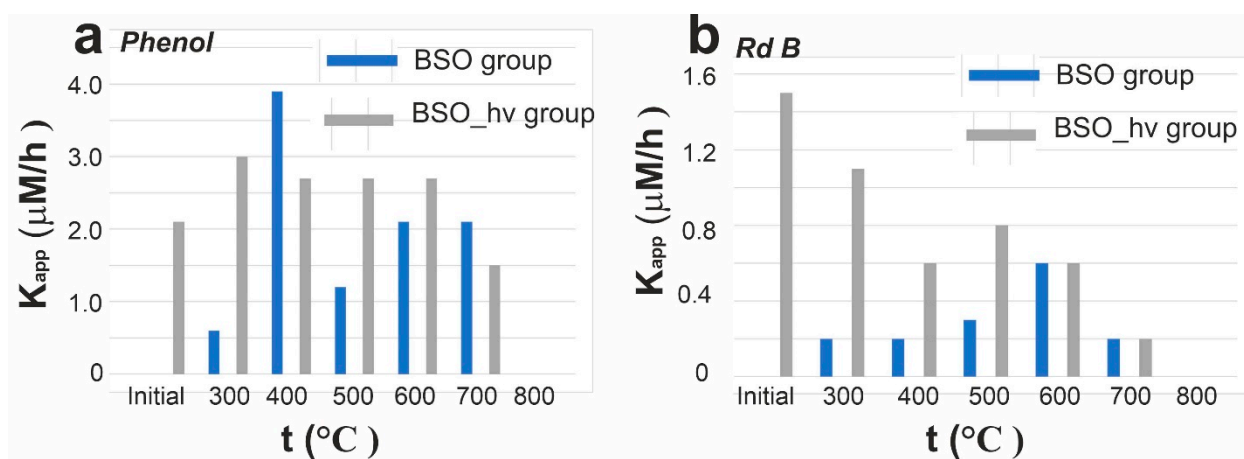

Figure S7. Photodecomposition rate constants for (a) phenol and (b) Rd B versus annealing temperature of photocatalysts.

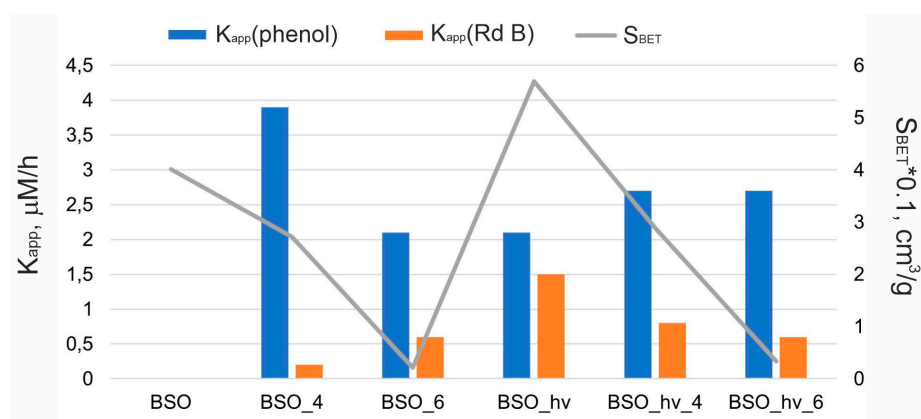

**Figure S8.** Photodecomposition rate constants difference in comparison with  $S_{BET}$  difference for some samples from the BSO and BSO\_hv groups.
